# Supplementary material for: A critique of Abraham and Acree’s correlation for deca-1,9-diene/water partition coefficients
Source: Royal Society of Chemistry journal article supplement (doi:10.1039/c2nj40622e), 2012-11-13
Supplement: c2nj40622e.pdf [file c2nj40622e.pdf]

# A critique of Abraham and Acree's correlation for deca-1,9-diene/water partition coefficients

Johannes M. Nitsche<sup>\*a</sup> and Gerald B. Kasting<sup>b</sup>

<sup>a</sup> Department of Chemical and Biological Engineering, University at Buffalo, The State University of New York, Buffalo, NY 14260-4200, USA. Fax: (716) 645-3822; Tel: (716) 645-1182; E-mail: nitsche@buffalo.edu

<sup>b</sup> James L. Winkle College of Pharmacy, University of Cincinnati Academic Health Center, Cincinnati, OH 45267-0004, USA. Fax: (513) 558-0978; Tel: (513) 558-1817; E-mail: KASTINGB@UCMAIL.UC.EDU

## Supplementary Material

Unless specifically indicated to the contrary, numbers of equations refer to the main text by default. Numbers of supplementary equations and tables presented here begin with the letter "S." Although many references cited here appear in the bibliography of the main text, others do not. To avoid possible confusion regarding reference numbers, citations here refer to the separate self-contained bibliography included at the end of this document.

### Calculation of molecular descriptors using partition coefficients

This section furnishes a brief summary of the general procedure employed by Abraham and coworkers.<sup>1-5</sup> To avoid ambiguity we use the symbols  $P_s$  and  $K_s$  for the quantities they call simply  $P$  and  $K$ .

In all that follows we consider a given solute, and regard its molecular descriptors  $E$ ,  $V$  and  $L$  to be known. They are relatively easy to come by, as discussed by Abraham and coworkers,<sup>1-5</sup> and typically the challenge is to determine  $A$ ,  $B$  and  $S$ . The symbol  $P_s$  denotes the solvent s/water partition coefficient defined as the ratio

$$P_s = \frac{\text{solute concentration in solvent s phase}}{\text{solute concentration in aqueous phase}} \quad (\text{S1})$$

at equilibrium. The symbol  $K_s$  denotes the solvent s/gas partition coefficient defined as the ratio

$$K_s = \frac{\text{solute concentration in solvent s phase}}{\text{solute concentration in gas phase}} \quad (\text{S2})$$

at equilibrium. The relation between these two partition coefficients involves a third coefficient  $K_w$  defined as the ratio

$$K_w = \frac{\text{solute concentration in aqueous phase}}{\text{solute concentration in gas phase}} \quad (\text{S3})$$

at equilibrium. The relation is

$$P_s = K_s/K_w. \quad (\text{S4})$$

With a value of  $K_w$  in hand, eqn. S4 can be used to determine  $K_s$  from a measured value of  $P_s$ . This equation can also be written as<sup>1-3</sup>

$$\log K_s = \log P_s + \log K_w. \quad (\text{S5})$$

(The plus (+) sign in Abraham et al.'s<sup>2</sup> eqn 5 is evidently a misprint, and should be a minus (-) sign.) Correlations giving the two partition coefficients  $P_s$  and  $K_s$  in terms of the molecular descriptors  $A$ ,  $B$ ,  $S$ ,  $E$ ,  $V$  and  $L$  have the forms<sup>1-4, 6, 7</sup>

$$\log P_s = c_s + a_s A + b_s B + s_s S + e_s E + v_s V \quad (\text{S6})$$

and

$$\log K_s = c'_s + a'_s A + b'_s B + s'_s S + e'_s E + l'_s L. \quad (\text{S7})$$

The molecular descriptor  $L$  is not used in eqn S6, and the molecular descriptor  $V$  is not used in eqn S7. Equation S6 is a repeat of eqn 1 in the main text. The “prime” ( $l$ ) superscripts appearing in eqn S7 serve as a reminder of the fact that the numerical values of  $c_s$ ,  $a_s$ ,  $b_s$ ,  $s_s$  and  $e_s$  are generally different from those of  $c'_s$ ,  $a'_s$ ,  $b'_s$ ,  $s'_s$  and  $e'_s$ , respectively. Although not strictly necessary, we affix the prime superscript also to the coefficient multiplying  $L$  in eqn S7 for consistency of notation; thus all coefficients appearing in this equation carry the prime superscript.

The procedure for calculating  $A$ ,  $B$  and  $S$  using solvent/water partition coefficients  $P_{s1}$ ,  $P_{s2}$  and  $P_{s3}$  measured for three solvents s1, s2 and s3, respectively, is based on the following three equations:<sup>2, 4, 5</sup>

$$\log P_{s1} = c_{s1} + a_{s1} \mathbf{A} + b_{s1} \mathbf{B} + s_{s1} \mathbf{S} + e_{s1} E + v_{s1} V, \quad (\text{S8a})$$

$$\log P_{s2} = c_{s2} + a_{s2} \mathbf{A} + b_{s2} \mathbf{B} + s_{s2} \mathbf{S} + e_{s2} E + v_{s2} V, \quad (\text{S8b})$$

$$\log P_{s3} = c_{s3} + a_{s3} \mathbf{A} + b_{s3} \mathbf{B} + s_{s3} \mathbf{S} + e_{s3} E + v_{s3} V. \quad (\text{S8c})$$

Use of boldface type does not imply vector character, but rather highlights the three unknowns for clarity. All other quantities are known. In particular, the three left-hand sides are base 10 logarithms of the three measured partition coefficients, the 18 coefficients  $c_{s1}, \dots, v_{s3}$ , are all known from previously established correlations, and the molecular descriptors  $E$  and  $V$  have been determined.

The procedure for calculating  $A$ ,  $B$  and  $S$  using solvent/water partition coefficients  $P_{s1}$  and  $P_{s2}$  measured for two solvents s1 and s2, respectively, is based on the following four equations:<sup>1, 3</sup>

$$\log P_{s1} = c_{s1} + a_{s1} \mathbf{A} + b_{s1} \mathbf{B} + s_{s1} \mathbf{S} + e_{s1} E + v_{s1} V, \quad (\text{S9a})$$

$$\log P_{s1} + \log K_w = c'_{s1} + a'_{s1} \mathbf{A} + b'_{s1} \mathbf{B} + s'_{s1} \mathbf{S} + e'_{s1} E + l'_{s1} L, \quad (\text{S9b})$$

$$\log P_{s2} = c_{s2} + a_{s2} \mathbf{A} + b_{s2} \mathbf{B} + s_{s2} \mathbf{S} + e_{s2} E + v_{s2} V, \quad (\text{S9c})$$

$$\log P_{s2} + \log K_w = c'_{s2} + a'_{s2} \mathbf{A} + b'_{s2} \mathbf{B} + s'_{s2} \mathbf{S} + e'_{s2} E + l'_{s2} L. \quad (\text{S9d})$$

Again, use of boldface type highlights the unknowns for clarity. The parameter  $\log K_w$  is considered as an unknown to be determined along with  $A$ ,  $B$  and  $S$ . The value found for it can be ignored subsequently if there is interest only in  $A$ ,  $B$  and  $S$ . Equation S5 has effectively been used on the left-hand sides of eqns S9b and S9d to express  $K_s$  in terms of  $P_s$  and  $\log K_w$  for

solvents  $s_1$  and  $s_2$ , respectively. These two equations (statements of eqn S7 for solvents  $s_1$  and  $s_2$ ) encode information additional to  $P_{s_1}$  and  $P_{s_2}$  needed to determine four unknowns — and the two-solvent scheme is valid — insofar as only experimentally determined solvent/gas partition coefficients  $K_{s_1}$  and  $K_{s_2}$  entered the correlation analysis underlying eqn S7.

The determination of molecular descriptors is strengthened by the inclusion of more than three and two measured solvent/water partition coefficients, respectively, in the schemes of eqns S8a–c and S9a–d. If more data are available, correspondingly more equations are added to these schemes, and they are solved as over-determined systems for the values of the molecular descriptors that best satisfy all the equations, based on some overall error criterion.<sup>1-5</sup> For present purposes we emphasize the equations as written in order to indicate the minimum number of solvent/water partition coefficients needed to determine  $A$ ,  $B$  and  $S$ . By the first scheme as written (eqns S9a–c) measured values of  $P_s$  for three different solvents  $s$  are required. By the second scheme (eqns S9a–d) only two are required.

### Summary of partition coefficients reported by Xiang, Anderson and coworkers

Table S1 lists the 18 compounds referred to in the main text for which only the deca-1,9-diene/water partition coefficient is reported by Xiang, Anderson and coworkers in their series of papers relating to phospholipid bilayer permeability.<sup>8-17</sup> Table S2 catalogs all solvent/water partition coefficients reported by these investigators. The compounds listed in Table S1 are distinguished by grey highlights in Table S2 to show their place within the overall dataset.

### Numerical oversights in Abraham and Acree's dataset

Table S3 lists the numerical oversights in Abraham and Acree's<sup>1</sup> Table 2 referred to in the main text.

### Sources of octanol/water partition coefficients

Database matches are indicated for four of the 18 compounds listed in Table S1 (*N,N*-dimethylacetamide, methyl acetate, phenylethylamine, 4-ethylphenol) in the Estimation Program Interface (EPI) Suite, US Environmental Protection Agency,<sup>18</sup> accessed through ChemSpider.<sup>19</sup> For the remaining 14, calculated estimates can be obtained using ACD/Labs' log  $P$  calculator accessed through the ChemSketch interface,<sup>20</sup> which utilizes the recommended "A" algorithm of the ACD/LogP DB program (Vers. 12).

Although the main text emphasizes the 18 compounds listed in Table S1, the sources just stated are what we consider to provide the most reliable values of  $P(\text{oct})$ . They were used to obtain  $P(\text{oct})$  in Ref. <sup>21</sup> for all compounds for which a measured value was not reported by Xiang, Anderson and coworkers, according to the following procedure. Where available, values of  $P(\text{oct})$  were obtained from the EPI Suite accessed through ChemSpider. In the absence of a database match within the EPI Suite, we used ACD/Labs' log  $P$  calculator.

## References

1. M. H. Abraham and W. E. Acree, Jr., *New J. Chem.*, 2012, **36**, 1798-1806.
2. M. H. Abraham, R. E. Smith, R. Luchtefeld, A. J. Boorem, R. Luo and W. E. Acree, *J. Pharm. Sci.*, 2010, **99**, 1500-1515.
3. M. H. Abraham, J. Gil-Lostes, J. E. Cometto-Muñiz, W. S. Cain, C. F. Poole, S. N. Atapattu, R. J. Abraham and P. Leonard, *New J. Chem.*, 2009, **33**, 76-81.
4. M. H. Abraham, A. Ibrahim and A. M. Zissimos, *J. Chromatogr. A*, 2004, **1037**, 29-47.
5. A. M. Zissimos, M. H. Abraham, M. C. Barker, K. J. Box and K. Y. Tam, *J. Chem. Soc., Perkin Trans. 2*, 2002, 470-477.
6. M. H. Abraham, H. S. Chadha, G. S. Whiting and R. C. Mitchell, *J. Pharm. Sci.*, 1994, **83**, 1085-1100.
7. M. H. Abraham, A. Ibrahim, A. M. Zissimos, Y. H. Zhao, J. Comer and D. P. Reynolds, *Drug Discov. Today*, 2002, **7**, 1056-1063.
8. T. X. Xiang and B. D. Anderson, *J. Pharm. Sci.*, 1994, **83**, 1511-1518.
9. T. X. Xiang and B. D. Anderson, *J. Membr. Biol.*, 1994, **140**, 111-122.
10. T. X. Xiang and B. D. Anderson, *J. Pharm. Sci.*, 1995, **84**, 1308-1315.
11. T. X. Xiang, Y. H. Xu and B. D. Anderson, *J. Membr. Biol.*, 1998, **165**, 77-90.
12. P. T. Mayer, T. X. Xiang and B. D. Anderson, *AAPS PharmSci*, 2000, **2**, art. no. 14.
13. P. T. Mayer and B. D. Anderson, *J. Pharm. Sci.*, 2002, **91**, 640-646.
14. P. T. Mayer, T. X. Xiang, R. Niemi and B. D. Anderson, *Biochemistry*, 2003, **42**, 1624-1636.
15. Y. Cao, T. X. Xiang and B. D. Anderson, *Mol. Pharmaceutics*, 2008, **5**, 371-388.
16. V. Joguparthi, T. X. Xiang and B. D. Anderson, *J. Pharm. Sci.*, 2008, **97**, 400-420.
17. R. W. Tejwani, T. R. Stouch and B. D. Anderson, *J. Pharm. Sci.*, 2009, **98**, 4534-4544.
18. April 27, 2012 at: <http://www.epa.gov/opptintr/exposure/pubs/episuite.htm>.
19. April 27, 2012 at: <http://www.chemspider.com>.
20. Advanced Chemistry Development, Inc., Toronto, Ontario, Canada.
21. J. M. Nitsche and G. B. Kasting, *J. Pharm. Sci.*, 2012, in press, doi: 10.1002/jps.23342.

**Table S1.** Eighteen compounds referred to in the main text for which only the deca-1,9-diene/water partition coefficient is reported by Xiang, Anderson and coworkers in their series of papers relating to phospholipid bilayer permeability.<sup>8-17</sup> Specific references for the reported values of  $P(10\text{diene})$  are indicated by footnote letters matching those in the more detailed Table S2 below, namely h denotes Cao et al.<sup>15</sup> and j denotes Tejwani et al.<sup>17</sup>

| Compound name                                                              | Designation in Ref. h (Cao et al. <sup>15</sup> ) | Compound name/formula and place in numerical order of Abraham and Acree's <sup>1</sup> Table 2                      | Reference for $P(10\text{diene})$ |
|----------------------------------------------------------------------------|---------------------------------------------------|---------------------------------------------------------------------------------------------------------------------|-----------------------------------|
| <i>N,N</i> -dimethylacetamide                                              | Ac-NMe <sub>2</sub>                               | <i>N,N</i> -Dimethylacetamide                                                                                       | 9 h                               |
| methyl acetate                                                             | Ac-OMe                                            | Methyl acetate                                                                                                      | 10 h                              |
| 2-(acetylamino)- <i>N,N</i> -dimethylacetamide                             | Ac-G-NMe <sub>2</sub>                             | CH <sub>3</sub> CONHCH <sub>2</sub> CONMe <sub>2</sub>                                                              | 11 h                              |
| methyl (acetylamino)acetate                                                | Ac-G-OMe                                          | CH <sub>3</sub> CONHCH <sub>2</sub> CO <sub>2</sub> Me                                                              | 12 h                              |
| <i>p</i> -toluoylalanine                                                   | Tol-A                                             | MeC <sub>6</sub> H <sub>4</sub> CONHCH(Me)CO <sub>2</sub> H                                                         | 26 h                              |
| <i>p</i> -toluoyldialanine                                                 | Tol-A-A                                           | MeC <sub>6</sub> H <sub>4</sub> CONHCH(Me)CONHCH(Me)CO <sub>2</sub> H                                               | 27 h                              |
| <i>p</i> -toluoylsarcosine                                                 | Tol-Sar                                           | MeC <sub>6</sub> H <sub>4</sub> CON(Me)CH <sub>2</sub> CO <sub>2</sub> H                                            | 29 h                              |
| <i>p</i> -toluoylglycylsarcosine                                           | Tol-G-Sar                                         | MeC <sub>6</sub> H <sub>4</sub> CONHCH <sub>2</sub> CON(Me)CH <sub>2</sub> CO <sub>2</sub> H                        | 31 h                              |
| 4-methylcarbamoylmethyl-phenyl)acetic acid                                 | CMPA-NHMe                                         | CO <sub>2</sub> HCH <sub>2</sub> C <sub>6</sub> H <sub>4</sub> CH <sub>2</sub> CONHMe                               | 44 h                              |
| {4-[2-(dimethylamino)-2-oxoethyl]phenyl}acetic acid                        | CMPA-NMe <sub>2</sub>                             | CO <sub>2</sub> HCH <sub>2</sub> C <sub>6</sub> H <sub>4</sub> CH <sub>2</sub> CONMe <sub>2</sub>                   | 45 h                              |
| [4-(2-([2-(dimethylamino)-2-oxoethyl]-amino)-2-oxoethyl)phenyl]acetic acid | CMPA-G-NMe <sub>2</sub>                           | CO <sub>2</sub> HCH <sub>2</sub> C <sub>6</sub> H <sub>4</sub> CH <sub>2</sub> NHCH <sub>2</sub> CONMe <sub>2</sub> | 46 h                              |
| phenylethylamine                                                           |                                                   | 2-Phenylethylamine                                                                                                  | 56 j                              |
| <i>p</i> -hydroxyphenylethylamine                                          |                                                   | <i>p</i> -Hydroxy-2-phenylethylamine                                                                                | 57 j                              |
| <i>N</i> -methyltyramine                                                   |                                                   | <i>p</i> -Hydroxy- <i>N</i> -methyl-2-phenylethylamine                                                              | 58 j                              |
| <i>N,N</i> -dimethyltyramine                                               |                                                   | <i>p</i> -Hydroxy- <i>N,N</i> -dimethyl-2-phenylethylamine                                                          | 59 j                              |
| <i>p</i> -methoxyphenylethylamine                                          |                                                   | <i>p</i> -Methoxy-2-phenylethylamine                                                                                | 60 j                              |
| <i>N</i> -methyl- <i>O</i> -methyltyramine                                 |                                                   | <i>p</i> -Methoxy- <i>N</i> -methyl-2-phenylethylamine                                                              | 61 j                              |
| 4-ethylphenol                                                              |                                                   | 4-Ethylphenol                                                                                                       | 62 j                              |



|                                                                            |                                      |                                                                                                                                  |    |  |   |   |  |   |  |  |  |  |  |  |  |  |  |  |  |  |  |   |     |
|----------------------------------------------------------------------------|--------------------------------------|----------------------------------------------------------------------------------------------------------------------------------|----|--|---|---|--|---|--|--|--|--|--|--|--|--|--|--|--|--|--|---|-----|
| methyl acetate                                                             | Ac-OMe <sup>h</sup>                  | Methyl acetate                                                                                                                   | 10 |  |   |   |  |   |  |  |  |  |  |  |  |  |  |  |  |  |  | h |     |
| 2-(acetylamino)- <i>N,N</i> -dimethylacetamide                             | Ac-G-NMe <sub>2</sub> <sup>h</sup>   | CH <sub>3</sub> CONHCH <sub>2</sub> CONMe <sub>2</sub>                                                                           | 11 |  |   |   |  |   |  |  |  |  |  |  |  |  |  |  |  |  |  |   | h   |
| methyl (acetylamino)acetate                                                | Ac-G-OMe <sup>h</sup>                | CH <sub>3</sub> CONHCH <sub>2</sub> CO <sub>2</sub> Me                                                                           | 12 |  |   |   |  |   |  |  |  |  |  |  |  |  |  |  |  |  |  |   | h   |
| <i>p</i> -toluoylalanine                                                   | Tol-A <sup>h</sup>                   | MeC <sub>6</sub> H <sub>4</sub> CONHCH(Me)CO <sub>2</sub> H                                                                      | 26 |  |   |   |  |   |  |  |  |  |  |  |  |  |  |  |  |  |  |   | g,h |
| <i>p</i> -toluoyldialanine                                                 | Tol-A-A <sup>h</sup>                 | MeC <sub>6</sub> H <sub>4</sub> CONHCH(Me)CONHCH(Me)CO <sub>2</sub> H                                                            | 27 |  |   |   |  |   |  |  |  |  |  |  |  |  |  |  |  |  |  |   | g,h |
| <i>p</i> -toluoylsarcosine                                                 | Tol-Sar <sup>h</sup>                 | MeC <sub>6</sub> H <sub>4</sub> CON(Me)CH <sub>2</sub> CO <sub>2</sub> H                                                         | 29 |  |   |   |  |   |  |  |  |  |  |  |  |  |  |  |  |  |  |   | g,h |
| <i>p</i> -toluoylglycylsarcosine                                           | Tol-G-Sar <sup>h</sup>               | MeC <sub>6</sub> H <sub>4</sub> CONHCH <sub>2</sub> CON(Me)CH <sub>2</sub> CO <sub>2</sub> H                                     | 31 |  |   |   |  |   |  |  |  |  |  |  |  |  |  |  |  |  |  |   | g,h |
| <i>p</i> -tolylacetic acid                                                 | MPA-OH <sup>h</sup>                  | MeC <sub>6</sub> H <sub>4</sub> CH <sub>2</sub> CO <sub>2</sub> H                                                                | 36 |  |   |   |  |   |  |  |  |  |  |  |  |  |  |  |  |  |  | h | g,h |
| <i>N</i> -methyl-2- <i>p</i> -tolylacetamide                               | MPA-NHMe <sup>h</sup>                | MeC <sub>6</sub> H <sub>4</sub> CH <sub>2</sub> CONHMe                                                                           | 37 |  |   |   |  |   |  |  |  |  |  |  |  |  |  |  |  |  |  | h | h   |
| <i>N,N</i> -dimethyl-2- <i>p</i> -tolylacetamide                           | MPA-NMe <sub>2</sub> <sup>h</sup>    | MeC <sub>6</sub> H <sub>4</sub> CH <sub>2</sub> CONMe <sub>2</sub>                                                               | 38 |  | h |   |  |   |  |  |  |  |  |  |  |  |  |  |  |  |  | h | h   |
| <i>p</i> -tolylacetic acid methyl ester                                    | MPA-OMe <sup>h</sup>                 | MeC <sub>6</sub> H <sub>4</sub> CH <sub>2</sub> CO <sub>2</sub> Me                                                               | 39 |  | h |   |  |   |  |  |  |  |  |  |  |  |  |  |  |  |  | h | h   |
| (2- <i>p</i> -tolylacetylamino)acetic acid                                 | MPA-G-OH <sup>h</sup>                | MeC <sub>6</sub> H <sub>4</sub> CH <sub>2</sub> CONHCH <sub>2</sub> CO <sub>2</sub> H                                            | 40 |  |   |   |  |   |  |  |  |  |  |  |  |  |  |  |  |  |  | h | h   |
| <i>N</i> -methylcarbamoylmethyl-2- <i>p</i> -tolylacetamide                | MPA-G-NHMe <sup>h</sup>              | MeC <sub>6</sub> H <sub>4</sub> CH <sub>2</sub> CONHCH <sub>2</sub> CONHMe                                                       | 41 |  |   |   |  |   |  |  |  |  |  |  |  |  |  |  |  |  |  | h | h   |
| <i>N,N</i> -dimethylcarbamoylmethyl-2- <i>p</i> -tolylacetamide            | MPA-G-NMe <sub>2</sub>               | MeC <sub>6</sub> H <sub>4</sub> CH <sub>2</sub> CONHCH <sub>2</sub> CONMe <sub>2</sub>                                           | 42 |  | h |   |  |   |  |  |  |  |  |  |  |  |  |  |  |  |  | h | h   |
| (2- <i>p</i> -tolylacetylamino)acetic acid methyl ester                    | MPA-G-OMe                            | MeC <sub>6</sub> H <sub>4</sub> CH <sub>2</sub> CONHCH <sub>2</sub> CO <sub>2</sub> Me                                           | 43 |  | h |   |  |   |  |  |  |  |  |  |  |  |  |  |  |  |  | h | h   |
| 4-methylcarbamoylmethyl-phenyl)acetic acid                                 | CMPA-NHMe <sup>h</sup>               | CO <sub>2</sub> HCH <sub>2</sub> C <sub>6</sub> H <sub>4</sub> CH <sub>2</sub> CONHMe                                            | 44 |  |   |   |  |   |  |  |  |  |  |  |  |  |  |  |  |  |  |   | g,h |
| {4-[2-(dimethylamino)-2-oxoethyl]phenyl}acetic acid                        | CMPA-NMe <sub>2</sub> <sup>h</sup>   | CO <sub>2</sub> HCH <sub>2</sub> C <sub>6</sub> H <sub>4</sub> CH <sub>2</sub> CONMe <sub>2</sub>                                | 45 |  |   |   |  |   |  |  |  |  |  |  |  |  |  |  |  |  |  |   | g,h |
| [4-(2-{[2-(dimethylamino)-2-oxoethyl]-amino}-2-oxoethyl)phenyl]acetic acid | CMPA-G-NMe <sub>2</sub> <sup>h</sup> | CO <sub>2</sub> HCH <sub>2</sub> C <sub>6</sub> H <sub>4</sub> CH <sub>2</sub> NHCH <sub>2</sub> CONMe <sub>2</sub> <sup>a</sup> | 46 |  |   |   |  |   |  |  |  |  |  |  |  |  |  |  |  |  |  |   | h   |
| phenylacetic acid                                                          |                                      | Phenylacetic acid                                                                                                                | 47 |  |   | c |  | c |  |  |  |  |  |  |  |  |  |  |  |  |  |   | c   |
| D-(-)-mandelic acid                                                        |                                      | Mandelic acid                                                                                                                    | 48 |  |   | c |  | c |  |  |  |  |  |  |  |  |  |  |  |  |  |   | c   |
| DB-67 lactone <sup>j</sup>                                                 |                                      |                                                                                                                                  |    |  |   |   |  |   |  |  |  |  |  |  |  |  |  |  |  |  |  |   | i   |
| phenylethylamine                                                           |                                      | 2-Phenylethylamine                                                                                                               | 56 |  |   |   |  |   |  |  |  |  |  |  |  |  |  |  |  |  |  |   | j   |
| <i>p</i> -hydroxyphenylethylamine                                          |                                      | <i>p</i> -Hydroxy-2-phenylethylamine                                                                                             | 57 |  |   |   |  |   |  |  |  |  |  |  |  |  |  |  |  |  |  |   | j   |
| <i>N</i> -methyltyramine                                                   |                                      | <i>p</i> -Hydroxy- <i>N</i> -methyl-2-phenylethylamine                                                                           | 58 |  |   |   |  |   |  |  |  |  |  |  |  |  |  |  |  |  |  |   | j   |
| <i>N,N</i> -dimethyltyramine                                               |                                      | <i>p</i> -Hydroxy- <i>N,N</i> -dimethyl-2-phenylethylamine                                                                       | 59 |  |   |   |  |   |  |  |  |  |  |  |  |  |  |  |  |  |  |   | j   |
| <i>p</i> -methoxyphenylethylamine                                          |                                      | <i>p</i> -Methoxy-2-phenylethylamine                                                                                             | 60 |  |   |   |  |   |  |  |  |  |  |  |  |  |  |  |  |  |  |   | j   |
| <i>N</i> -methyl- <i>O</i> -methyltyramine                                 |                                      | <i>p</i> -Methoxy- <i>N</i> -methyl-2-phenylethylamine                                                                           | 61 |  |   |   |  |   |  |  |  |  |  |  |  |  |  |  |  |  |  |   | j   |
| 4-ethylphenol                                                              |                                      | 4-Ethylphenol                                                                                                                    | 62 |  |   |   |  |   |  |  |  |  |  |  |  |  |  |  |  |  |  |   | j   |
| Ethane <sup>k</sup>                                                        |                                      | Ethane                                                                                                                           | 4  |  |   |   |  |   |  |  |  |  |  |  |  |  |  |  |  |  |  |   |     |
| helium <sup>k</sup>                                                        |                                      | Helium                                                                                                                           | 1  |  |   |   |  |   |  |  |  |  |  |  |  |  |  |  |  |  |  |   |     |
| neon <sup>k</sup>                                                          |                                      | Neon                                                                                                                             | 2  |  |   |   |  |   |  |  |  |  |  |  |  |  |  |  |  |  |  |   |     |
| hydrogen <sup>k</sup>                                                      |                                      | Hydrogen                                                                                                                         | 3  |  |   |   |  |   |  |  |  |  |  |  |  |  |  |  |  |  |  |   |     |

<sup>a</sup>Xiang and Anderson (1994a).<sup>8</sup>

<sup>b</sup>Xiang and Anderson (1994b).<sup>9</sup>

<sup>c</sup>Xiang and Anderson (1995).<sup>10</sup>

<sup>d</sup>Xiang, Xu and Anderson (1998).<sup>11</sup>

<sup>e</sup>Mayer, Xiang and Anderson (2000).<sup>12</sup>

<sup>f</sup>Mayer and Anderson (2002).<sup>13</sup>

<sup>g</sup>Mayer et al. (2003).<sup>14</sup>

<sup>h</sup>Cao et al. (2008).<sup>15</sup>

<sup>i</sup>Joguparthi et al. (2008).<sup>16</sup>

<sup>j</sup>Tejwani et al. (2009).<sup>17</sup>

<sup>i</sup>Chemical formula seems to be incorrect.

<sup>j</sup>Compound not considered by Abraham and Acree (2012).<sup>1</sup>

<sup>k</sup>Compound considered by Abraham and Acree (2012),<sup>1</sup> but not by Xiang, Anderson and coworkers.<sup>8-17</sup>



**Table S3.** List of numerical oversights in Abraham and Acree's<sup>1</sup> Table 2.

| Compound name                                                              | Compound name or formula and place in numerical order of Abraham and Acree's Table 2 | Quantity | Value listed by Abraham and Acree | Correct value       |                     |
|----------------------------------------------------------------------------|--------------------------------------------------------------------------------------|----------|-----------------------------------|---------------------|---------------------|
| water                                                                      | Water                                                                                | 5        | $\log P(10\text{diene})$          | -3.82               | -3.92 <sup>a</sup>  |
| <i>p</i> -toluoyldialanine                                                 | MeC6H4CONHCH(Me)CONHCH(Me)CO2H                                                       | 27       | <i>V</i>                          | 2.2146              | 2.1490 <sup>b</sup> |
| 4-methylcarbamoylmethyl-phenyl)acetic acid                                 | CO2HCH2C6H4CH2CONHMe <sup>c</sup>                                                    | 44       | <i>V</i>                          | 1.4699              | 1.6108 <sup>b</sup> |
| {4-[2-(dimethylamino)-2-oxoethyl]phenyl}acetic acid                        | CO2HCH2C6H4CH2CONMe2                                                                 | 45       | <i>V</i>                          | 1.6108              | 1.7517 <sup>b</sup> |
| [4-(2-{[2-(dimethylamino)-2-oxoethyl]-amino}-2-oxoethyl)phenyl]acetic acid | CO2HCH2C6H4CH2NHCH2CONMe2                                                            | 46       | <i>V</i>                          | 1.9924              | 2.1490 <sup>b</sup> |
| $\alpha$ -carboxy- <i>p</i> -methylhippuric acid                           | CO2HCH2C6H4CH2NHCH2CO2H                                                              | 54       | <i>V</i>                          | 1.6695 <sup>d</sup> | 1.6852 <sup>b</sup> |
| $\alpha$ -methoxy- <i>p</i> -toluic acid                                   | MeOCH2C6H4CO2H                                                                       | 19       | <i>V</i>                          | 1.2720 <sup>d</sup> | 1.2722 <sup>b</sup> |
| $\alpha$ -cyano- <i>p</i> -toluic acid                                     | CNCH2C6H4CO2H                                                                        | 20       | <i>V</i>                          | 1.2270 <sup>d</sup> | 1.2273 <sup>b</sup> |
| $\alpha$ -hydroxy- <i>p</i> -toluic acid                                   | HOCH2C6H4CO2H                                                                        | 21       | <i>V</i>                          | 1.1310 <sup>d</sup> | 1.1313 <sup>b</sup> |

<sup>a</sup>Value given by Xiang and Anderson<sup>9</sup> is  $(1.2 \pm 0.1) \times 10^{-4}$ ;  $\log_{10}(1.2 \times 10^{-4}) = -3.92$ .

<sup>b</sup>Value given by Absolv program from ACD/Labs' ADME Suite (Vers. 5.0).<sup>20</sup>

<sup>c</sup>Chemical formula seems to be incorrect.

<sup>d</sup>The slight difference from the correct value is flagged for completeness, but we regard it as numerically inconsequential.
